# Supplementary material for: Combinational Therapy of Cardiac Atrial Appendage Stem Cells and Pyridoxamine: The Road to Cardiac Repair?
Source: MDPI journal article supplement (doi:10.3390/ijms22179266), 2021-08-27
Supplement: s1 [file s1]

## Combinational Therapy of Cardiac Atrial Appendage Stem Cells and Pyridoxamine: The Road to Cardiac Repair?

Lize Evens <sup>1</sup>, Hanne Beliën <sup>1</sup>, Sarah D'Haese <sup>1</sup>, Sibren Haesen <sup>1</sup>, Maxim Verboven <sup>1</sup>, Jean-Luc Rummens <sup>1,2</sup>, Annelies Bronckaers <sup>1</sup>, Marc Hendrikx <sup>1</sup>, Dorien Deluyker <sup>1,†</sup>, and Virginie Bito <sup>1,\*,†</sup>

### 1. Supplemental figures & tables

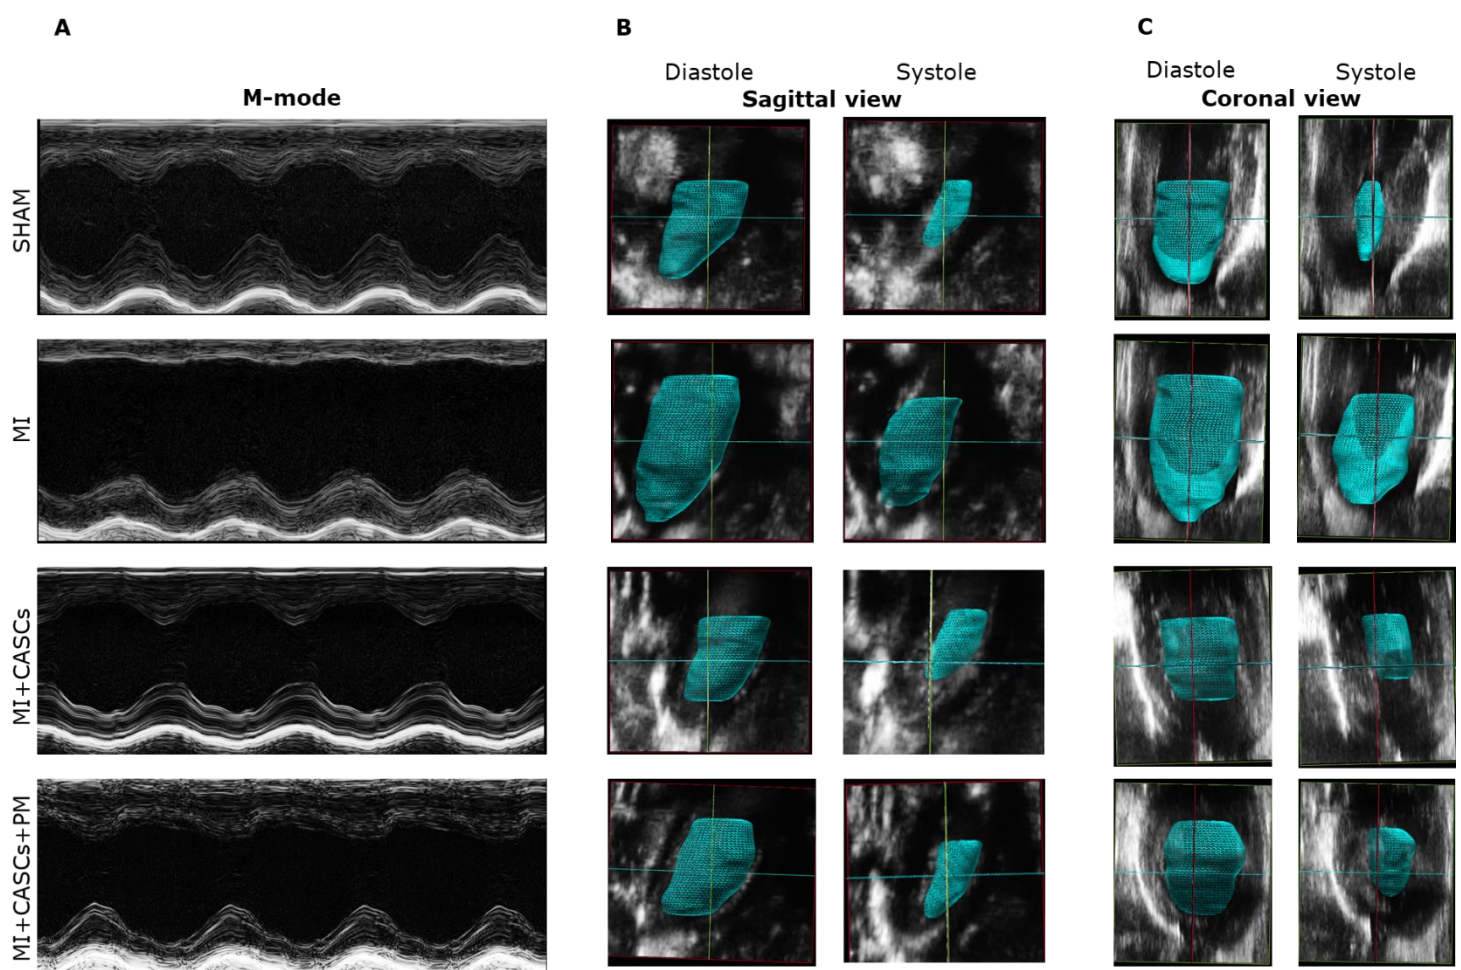

Figure S1. Representative echocardiographic images. (A) Representative images of M-modes obtained during parasternal short-axis view at mid-ventricular level of SHAM, MI, MI + CASCs, and MI + CASCs + PM animals. (B,C) Representative images of 4D reconstructed hearts during diastole and systole in (B) sagittal view and (C) coronal view of SHAM, MI, MI + CASCs, and MI + CASCs + PM animals.

Table S1: Diastolic echocardiographic characteristics.

| Parameters          | 4 Weeks Post-Operative |             |             |                 |
|---------------------|------------------------|-------------|-------------|-----------------|
|                     | SHAM                   | MI          | MI + CASCs  | MI + CASCs + PM |
| Longitudinal FS (%) | 18 ± 3                 | 18 ± 3      | 22 ± 2      | 23 ± 3          |
| Radial FS (%)       | 50 ± 5                 | 38 ± 5      | 50 ± 5      | 47 ± 4          |
| E/E'                | -26 ± 4                | -32 ± 6     | -29 ± 3     | -27 ± 4         |
| E/A                 | 1.39 ± 0.21            | 1.80 ± 0.35 | 1.33 ± 0.11 | 1.27 ± 0.07     |
| IVCT (ms)           | 21.1 ± 1.2             | 23.8 ± 1.1  | 22.3 ± 1.3  | 22.2 ± 1.3      |
| IVRT (ms)           | 24.1 ± 1.5             | 22.7 ± 1.2  | 21.2 ± 1.0  | 22.2 ± 1.0      |

Diastolic echocardiographic characteristics 4 weeks post-op in SHAM ( $n = 5$ ), MI ( $n = 11$ ), MI + CASCs ( $n = 10$ ), and MI + CASCs + PM ( $n = 9$ ) animals. Data are expressed as mean ± SEM. FS: fractional shortening, E: early diastolic transmitral flow velocity, E': peak early-diastolic annular velocity, A: late diastolic transmitral flow velocity, IVCT: isovolumetric contraction time, IVRT: isovolumetric relaxation time.

Table S2: Sequences of forward and reverse primers used in qPCR.

| Gene          | Forward Primer                    | Reverse Primer                    |
|---------------|-----------------------------------|-----------------------------------|
| IFN- $\gamma$ | GAA AGA CAA CCA GGC CAT CAG       | TCA TGA ATG CAT CCT TTT TTG C     |
| IL-6          | CGA AAG TCA ACT CCA TCT GCC       | GGC AAC TGG CTG GAA GTC TCT       |
| HPRT          | CTC ATG GAC TGA TTA TGG ACA GGA C | GCA GGT CAG CAA AGA ACT TAA AGC C |
| PGK1          | ATG CAA AGA CTG GCC AAG CTA C     | AGC CAC AGC CTC AGC ATA TTC       |

Primer sequences are given in their 5'-3' orientation. IFN- $\gamma$ : interferon- $\gamma$ , IL-6: interleukin-6, HPRT: hypoxanthine-guanine phosphoribosyl transferase, PGK1: phosphoglycerate kinase 1.
